# Supplementary material
Source: Springer Nature journal article supplement (https://www.springermedizin.de/resource/supplementary/12875_2012_791_MOESM2_ESM.pdf/9435392)

Cost GBP

2500  
2000  
1500  
1000  
500  
0

Pragmatic rehabilitation      Supportive listening      Treatment as usual

- Other healthcare 44-70 weeks
- Other healthcare 20-44 weeks (predicted)
- Other healthcare 0-20 weeks
- Therapy 0-20 weeks

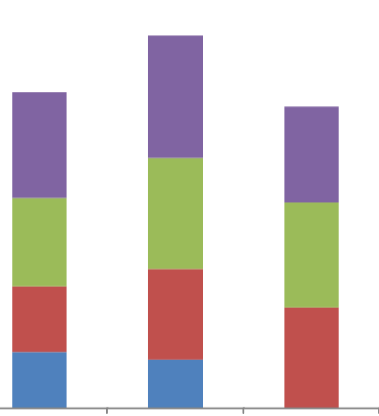

Supplement: MOESM2 [file 9435392]
